# Supplementary material for: Influence of the metal phthalocyanine molecular orientation on charge separation at the organic donor/acceptor interface
Source: Royal Society of Chemistry journal article supplement (doi:10.1039/d0tc04895j), 2021-01-01
Supplement: d0tc04895j1.pdf [file d0tc04895j1.pdf]

## Supplementary Information

### **Influence of metal phthalocyanine molecular orientation on charge separation at organic donor/acceptor interface**

Heeseon Lim,<sup>ab</sup> Sena Yang,<sup>b</sup> Sang-Hoon Lee,<sup>c</sup> Jung-Yong Lee,<sup>c</sup> Yeunhee Lee,<sup>d</sup> Situmorang Andres Bethavan,<sup>e</sup> Yong-Hyun Kim,<sup>de</sup> and Jeong Won Kim<sup>\*b</sup>

---

<sup>a</sup> Department of Chemistry, KAIST, 291 Daehak-ro, Yuseong-gu, Daejeon 34141, Korea.

<sup>b</sup> Korea Research Institute of Standards and Science, 267 Gajeong-ro, Yuseong-gu, Daejeon 34113, Korea.

<sup>c</sup> Graduate School of EEWS, Graphene Research Center, KAIST, 291 Daehak-ro, Yuseong-gu, Daejeon 34141, Korea.

<sup>d</sup> Graduate School of Nanoscience and Technology, KAIST, 291 Daehak-ro, Yuseong-gu, Daejeon 34141, Korea

<sup>e</sup> Department of Physics, KAIST, 291 Daehak-ro, Yuseong-gu, Daejeon 34141, Korea.

**Table S1.** Ionization potential (IP) values marked in Figure 3 for C<sub>60</sub>/MPc (M = Zn, Cu) bilayer without and with Cul layer by the UPS measurement.

| IP              |       | M = Zn(II)  |          | M = Cu(II)  |          |
|-----------------|-------|-------------|----------|-------------|----------|
| Coverage        |       | Without Cul | With Cul | Without Cul | With Cul |
| MPc             | 10nm  | 5.07        | 4.85     | 5.00        | 5.63     |
| C <sub>60</sub> | 0.3nm | 5.05        | 4.88     | 4.80        | 5.50     |
|                 | 0.6nm | 5.05        | 4.95     | 4.70        | 5.50     |

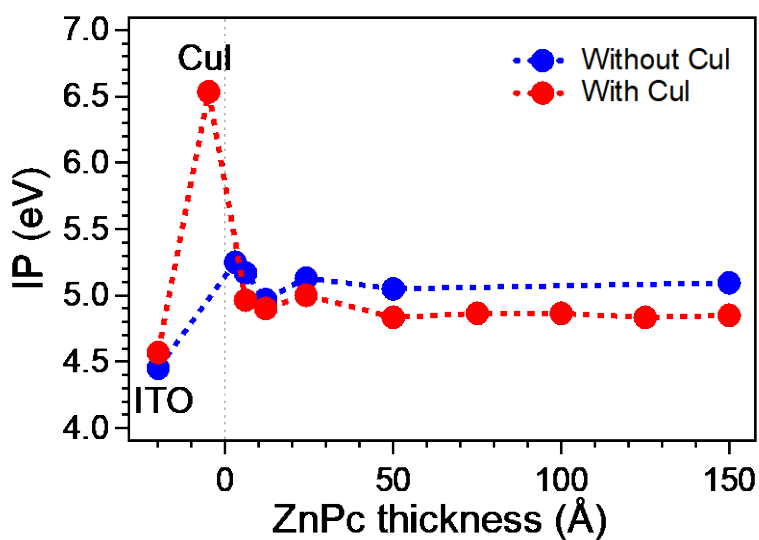

**Fig. S1** Ionized potential (IP) versus ZnPc thickness with (red) and without (blue) Cul layer

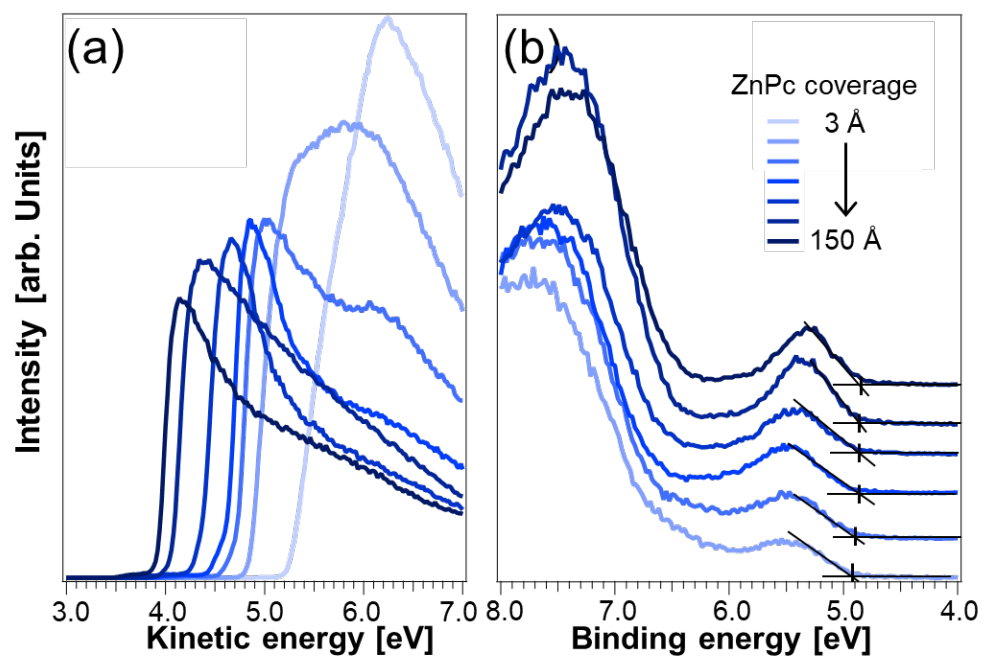

**Fig. S2** (a) The secondary electron cutoff (SECO) and (b) the valence band spectra of ZnPc layer on CuI/ITO during the continuous ZnPc evaporation from 3 Å to 150 Å.

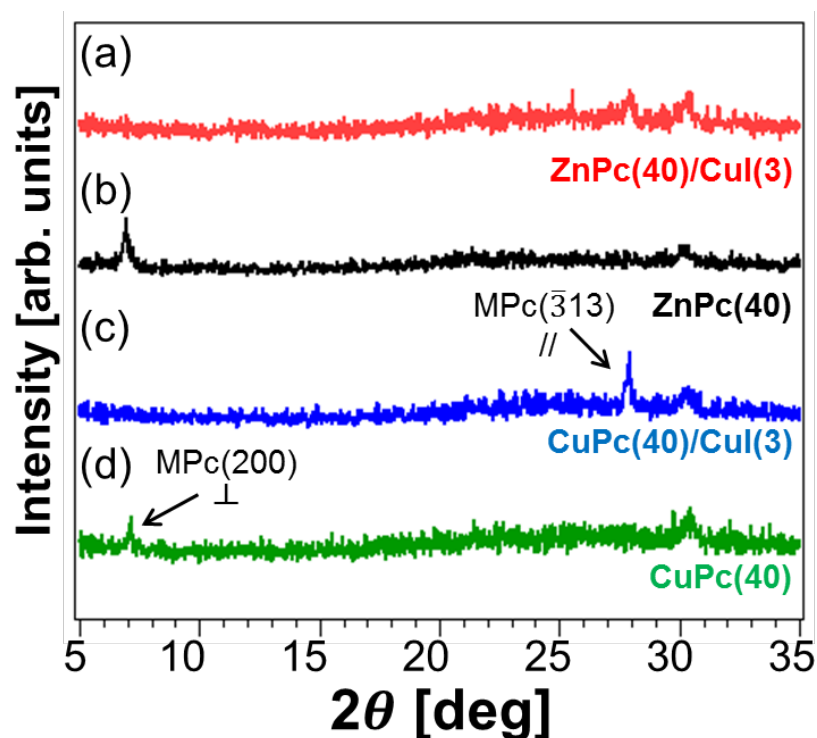

**Fig. S3** X-Ray Diffraction (XRD) patterns of (a) ZnPc/CuI, (b) ZnPc, (c) CuPc/CuI, and (d) CuPc deposited on ITO substrates. The MPc is 40 nm-thick and CuI is 3 nm-thick. The molecular orientation of MPc films exhibits the  $\alpha$ -form. The small peak at  $\sim 30.2^\circ$  is attributed to ITO substrate.

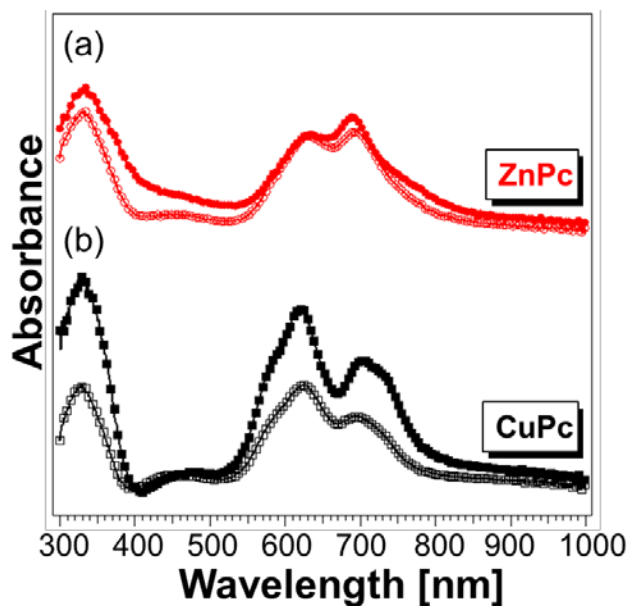

**Fig. S4** UV absorption spectra of (a) 10 nm ZnPc and (b) 10 nm CuPc with (filled symbols) or without (open symbols) 3 nm CuI layer deposited on the ITO, respectively.

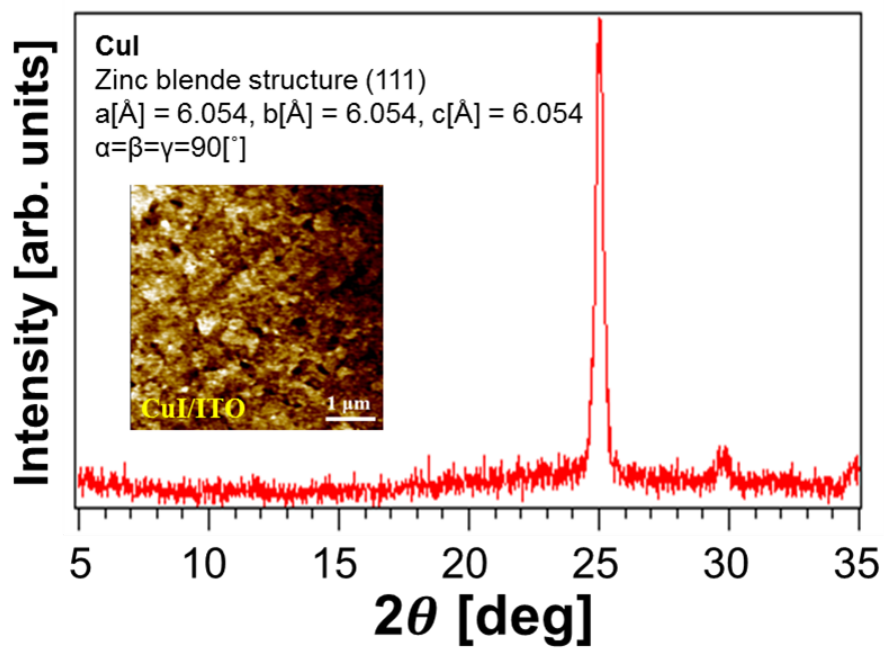

**Fig. S5** X-Ray Diffraction (XRD) pattern and AFM image of 10 nm CuI deposited on ITO substrates.

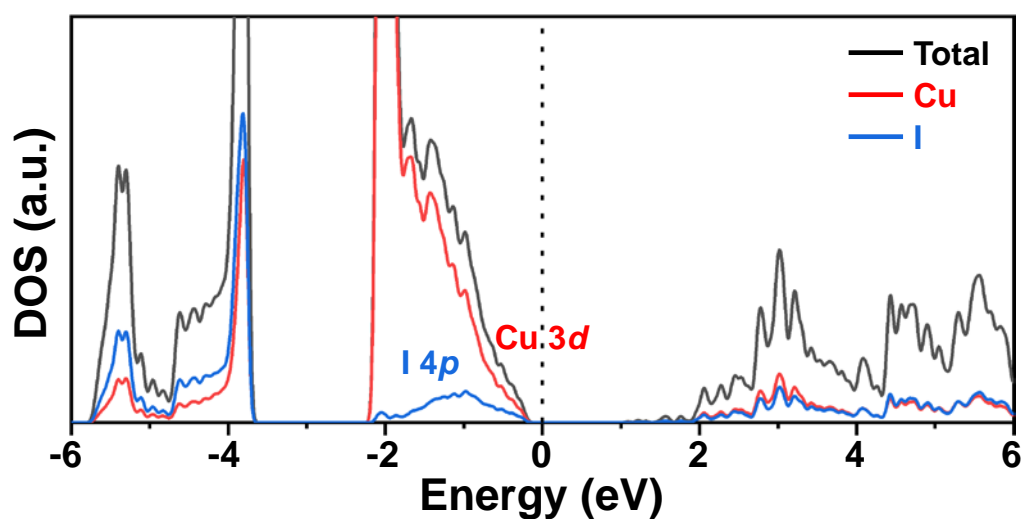

**Fig. S6** Density of state (DOS) of CuI bulk. Black, red and blue lines indicate total DOS of CuI bulk, partial DOS of copper and iodine, respectively. Energy zero indicates the Fermi level.

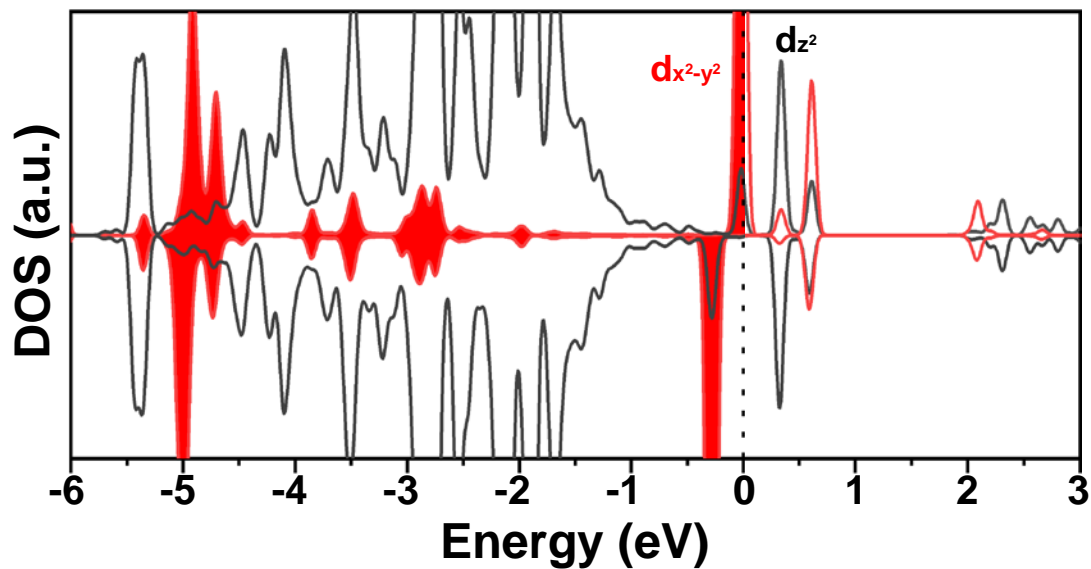

**Fig. S7** Partial density of states (PDOS) of binding model of CuPc to CuI( $\bar{1}\bar{1}\bar{1}$ )-3Cu<sub>adatom</sub>  $\sqrt{3}\times\sqrt{3}$  R30° surface. Black line indicates the  $d_{z^2}$  states of surface Cu atoms and red line indicates the  $d_{x^2-y^2}$  states of Cu in CuPc. Energy zero indicates the Fermi level.

**Table S2.** The cell structures and corresponding device parameters.

| Cell structure                                          | $V_{oc}$<br>(V) | $J_{sc}$ (EQE)<br>(mA/cm <sup>2</sup> ) | FF   | PCE<br>(%) |
|---------------------------------------------------------|-----------------|-----------------------------------------|------|------------|
| ITO/CuPc(20)/C <sub>60</sub> (40)/BCP(8)/Al(100)        | 0.47            | 3.89 (3.86)                             | 0.56 | 1.01       |
| ITO/CuI(3)/CuPc(20)/C <sub>60</sub> (40)/BCP(8)/Al(100) | 0.51            | 4.27 (4.82)                             | 0.60 | 1.31       |
| ITO/ZnPc(20)/C <sub>60</sub> (40)/BCP(8)/Al(100)        | 0.53            | 3.98 (4.04)                             | 0.62 | 1.30       |
| ITO/CuI(3)/ZnPc(20)/C <sub>60</sub> (40)/BCP(8)/Al(100) | 0.55            | 5.28 (5.56)                             | 0.63 | 1.84       |

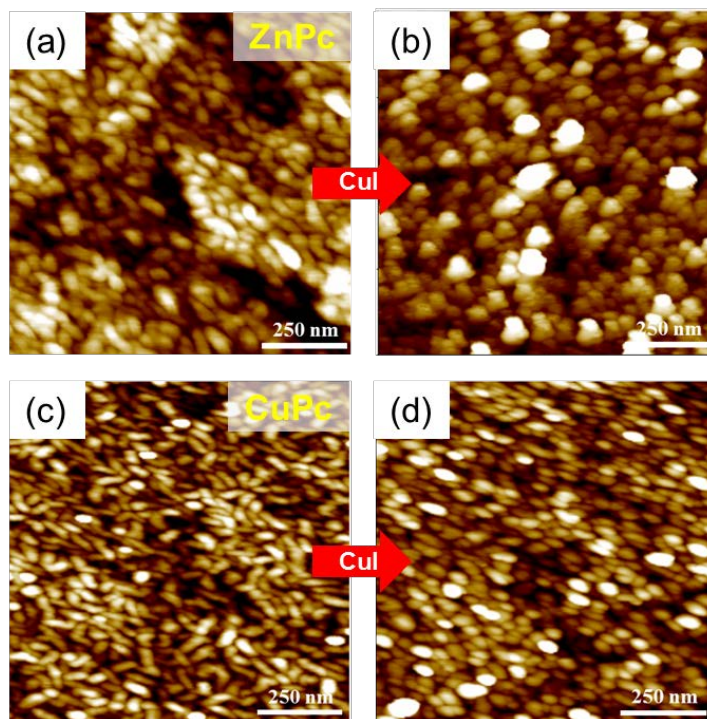

**Fig. S8** AFM images of 40 nm thin films of (a) ZnPc, (b) ZnPc/CuI, (c) CuPc, and (d) CuPc/CuI deposited on ITO, respectively. The thickness of CuI layer is 3 nm. All MPc and CuI layers are deposited at the rate of 0.1 Å/s.

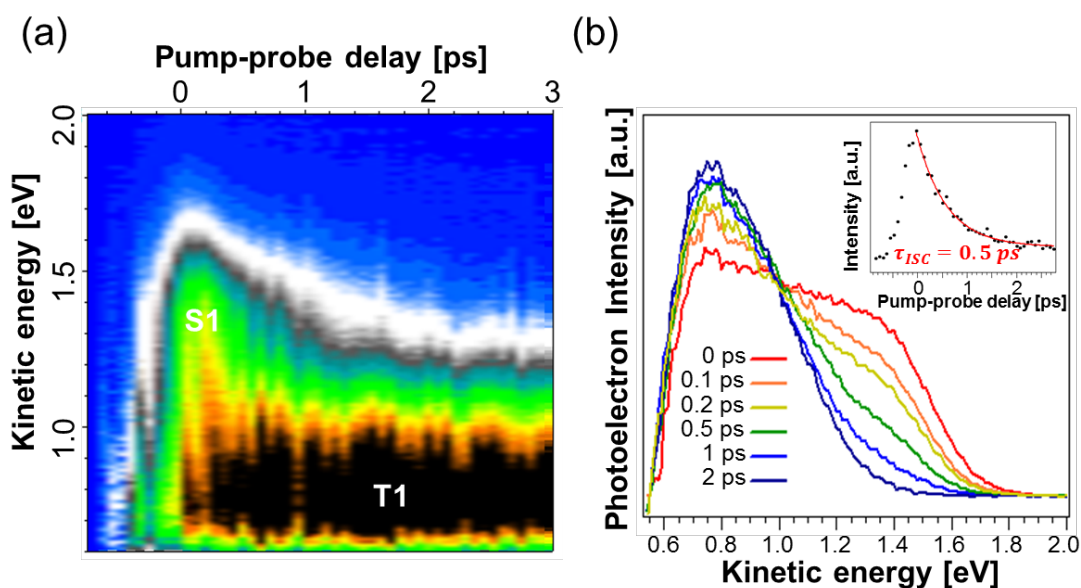

**Fig. S9** (a) Two-dimensional TR-2PPE trace of 10 nm CuPc film deposited on Au(111) substrate with 5 nm CuI layer. The pump ( $h\nu_1$ ) and probe energies ( $h\nu_2$ ) are 1.65 eV and 4.96 eV, respectively. (b)

Energy-resolved 2PPE spectra at the different delay times (0.1, 0.2, 0.5, 1 and 2 ps). Inset: Intensity change at S1 peak ( $\sim 1.35$  eV) as a function of time delay.

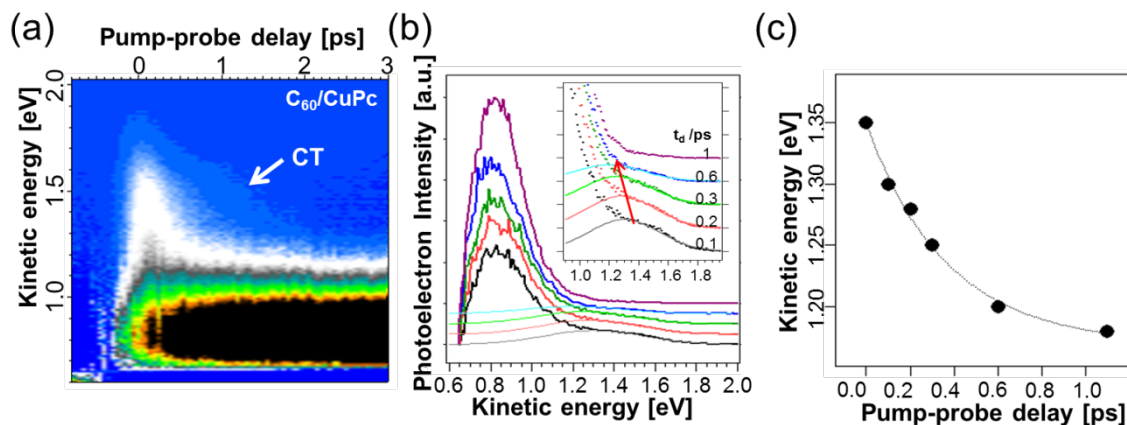

**Fig. S10** Two-dimensional TR-2PPE trace of (a) 1 nm C<sub>60</sub>/10 nm CuPc on Au(111) substrate with 5 nm CuI layer. (b) Energy-resolved 2PPE spectra at the early delay times (0.1, 0.2, 0.3, 0.6 and 1 ps). Inset: Magnified 2PPE spectra at high kinetic energy range. (c) Change of CT position as a function of pump-probe delay ( $\Delta t$ ). The pump ( $h\nu_1$ ) and probe energies ( $h\nu_2$ ) are 1.65 eV and 4.96 eV, respectively.
